# Supplementary material
Source: PubMed Central journal article supplement (PMC9061810)
Supplement: 41401_2021_743_MOESM6_ESM.pdf [file 41401_2021_743_MOESM6_ESM.pdf]

## Supplementary Materials

### Abbreviations

*Cpt1*, carnitine palmitoyltransferase1; *Cpt2*, carnitine palmitoyltransferase2; *Acox1*, acyl-Coenzyme A oxidase 1; *Acaa2*, acetyl-Coenzyme A acyltransferase 2; *Acadvl*, acyl-Coenzyme A dehydrogenase, very long chain; *Aldh9a1*, aldehyde dehydrogenase 9, subfamily A1; *Hadh*, hydroxyacyl-Coenzyme A dehydrogenase; *Hadha*, hydroxyacyl-Coenzyme A dehydrogenase, alpha subunit; *Hadhb*, hydroxyacyl-Coenzyme A dehydrogenase, beta subunit; *Eci2*, enoyl-Coenzyme A delta isomerase 2; *Acadm*, acyl-Coenzyme A dehydrogenase, medium chain; *Acads*, acyl-Coenzyme A dehydrogenase, short chain; *Acat1*, acetyl-Coenzyme A acetyltransferase 1; *Ucp3*, uncoupling protein 3; *Acot2*, acyl-CoA thioesterase 2; *Akr1b8*, aldo-keto reductase family 1, member B8; *Plpp1*, phospholipid phosphatase 1; *Dgat2*, diacylglycerol O-acyltransferase 2; *Dgkh*, diacylglycerol kinase, eta; *Gpat3*, 1-acylglycerol-3-phosphate O-acyltransferase 9; *Ash1*, N-acylsphingosine amidohydrolase 1; *B4galt6*, UDP-Gal:betaGlcNAc beta 1,4-galactosyltransferase, polypeptide 6; *Sgpp1*, sphingosine-1-phosphate phosphatase 1; *Galc*, galactosylceramidase; *Acer2*, alkaline ceramidase 2; *Ugcg*, UDP-glucose ceramide glucosyltransferase; *Sgms1*, sphingomyelin synthase 1; *Pla2g4a*, phospholipase A2, group IVA; *Pld3*, phospholipase D family, member 3; *Chkb*, choline kinase beta; *Lpcat3*, lysophosphatidylcholine acyltransferase 3; *Glut1*, solute carrier family 2 (facilitated glucose transporter), member 1; *Glut4*, solute carrier family 2 (facilitated glucose transporter), member 4; *Hk1*, hexokinase 1; *Hk2*, hexokinase 2; *Gpi1*, glucose phosphate isomerase 1; *Pfkm*, phosphofructokinase, muscle; *Pfkp*, phosphofructokinase, platelet; *Pfkl*, phosphofructokinase, liver; *Pgam1*, phosphoglycerate mutase 1; *Pkm*, pyruvate kinase, muscle; *Coll4a1*, collagen type XIV alpha 1; *Lox*, lysyl oxidase; *Tgfb2*, transforming growth factor beta 2; *Cyp1b1*, cytochrome P450 family 1, subfamily b polypeptide 1; *Comp*, cartilage oligomeric matrix protein; *Ccdc80*, coiled-coil domain containing 80; *Fnl1*, fibronectin 1; *Fbln1*, fibulin 1; *Thbs4*, thrombospondin 4; *Coll2a1*, collagen type XII alpha 1; *Mfap4*, microfibrillar-associated protein 4.
